# Supplementary material
Source: publisher site journal article supplement (https://www.dovepress.com/get_supplementary_file.php?f=440722.docx)
Supplement: Supplementary file 1 [file get_supplementary_file.php]

**Additional materials**

**Supplemental Figures**

Figure S1. ROC curve analysis of the PLR to predict recurrence in patients with paroxysmal atrial fibrillation. ROC: receiver operating characteristic; Abbreviations: PLR, platelet to lymphocyte ratio; ROC, receiver operating characteristic.


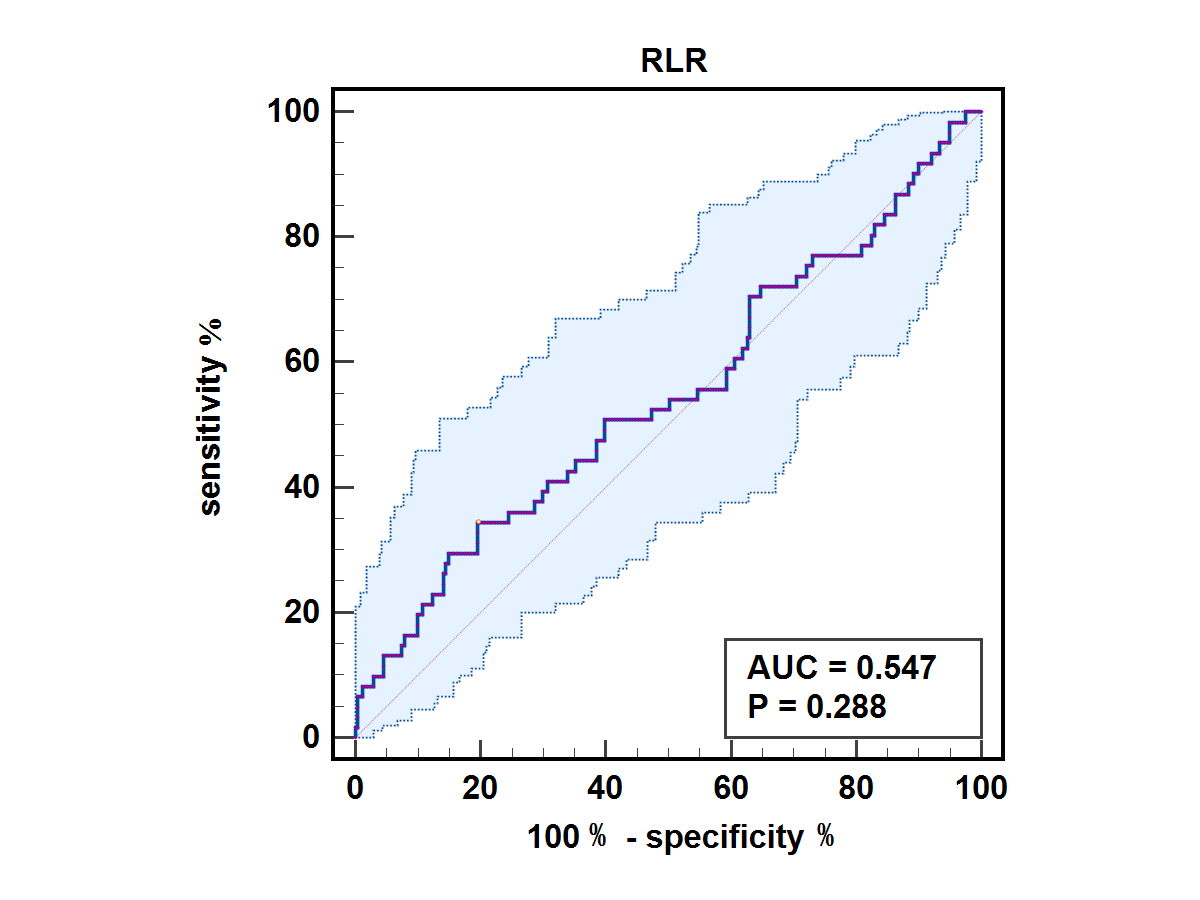


Figure S2. ROC curve analysis of the CHA2DS2‑VASc score to predict recurrence in patients with paroxysmal atrial fibrillation. Abbreviations: ROC, receiver operating characteristic.


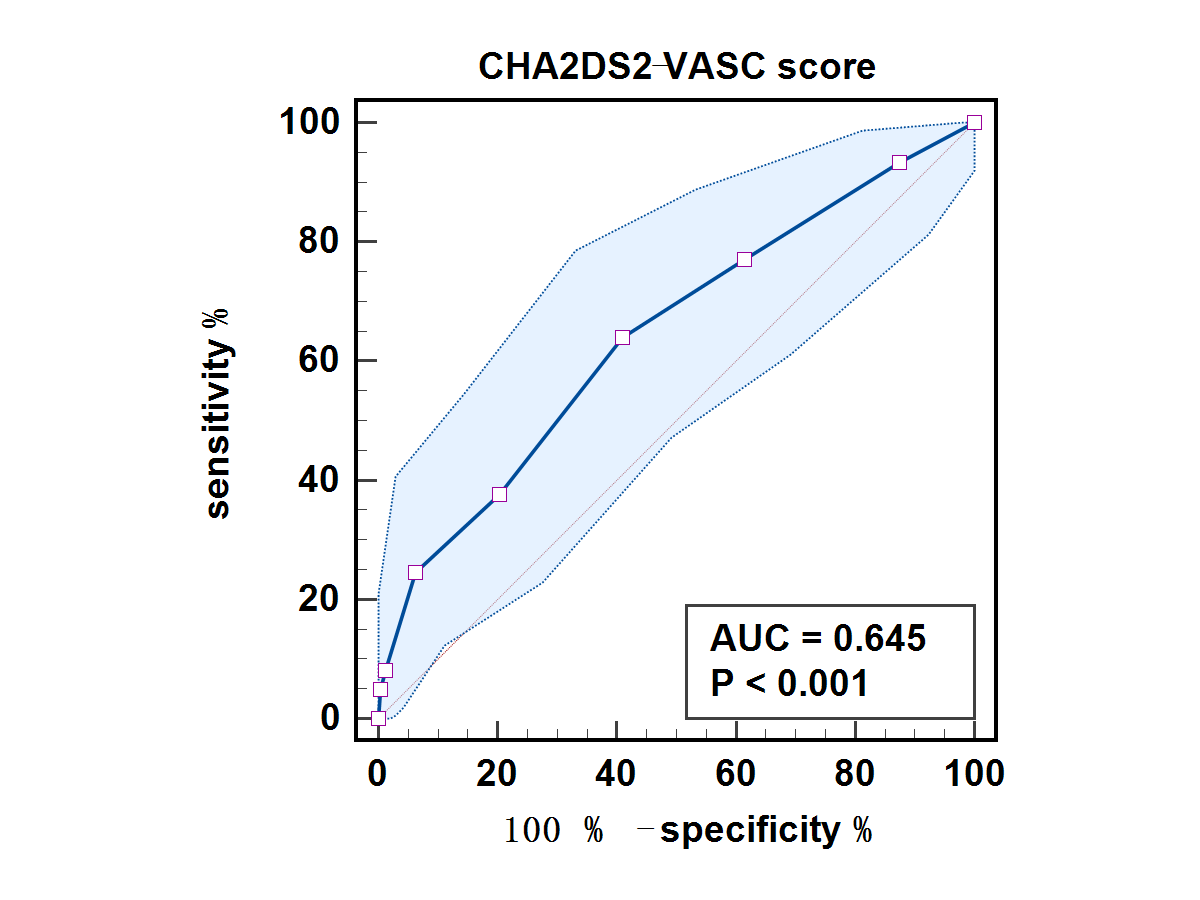


Figure S3. Model performance assessed by calibration curve. The calibration curve was adopted to assess the predictive performance in the model containing the APPLE score plus PLR. The x-axis represents the predicted recurrence risk. The y-axis represents the actual recurrence rate. Apparent refers to apparent performance for calibration; bias-corrected refers to optimism-corrected in internal validation; bootstrap=1000. Abbreviations: PLR, platelet to lymphocyte rateo.


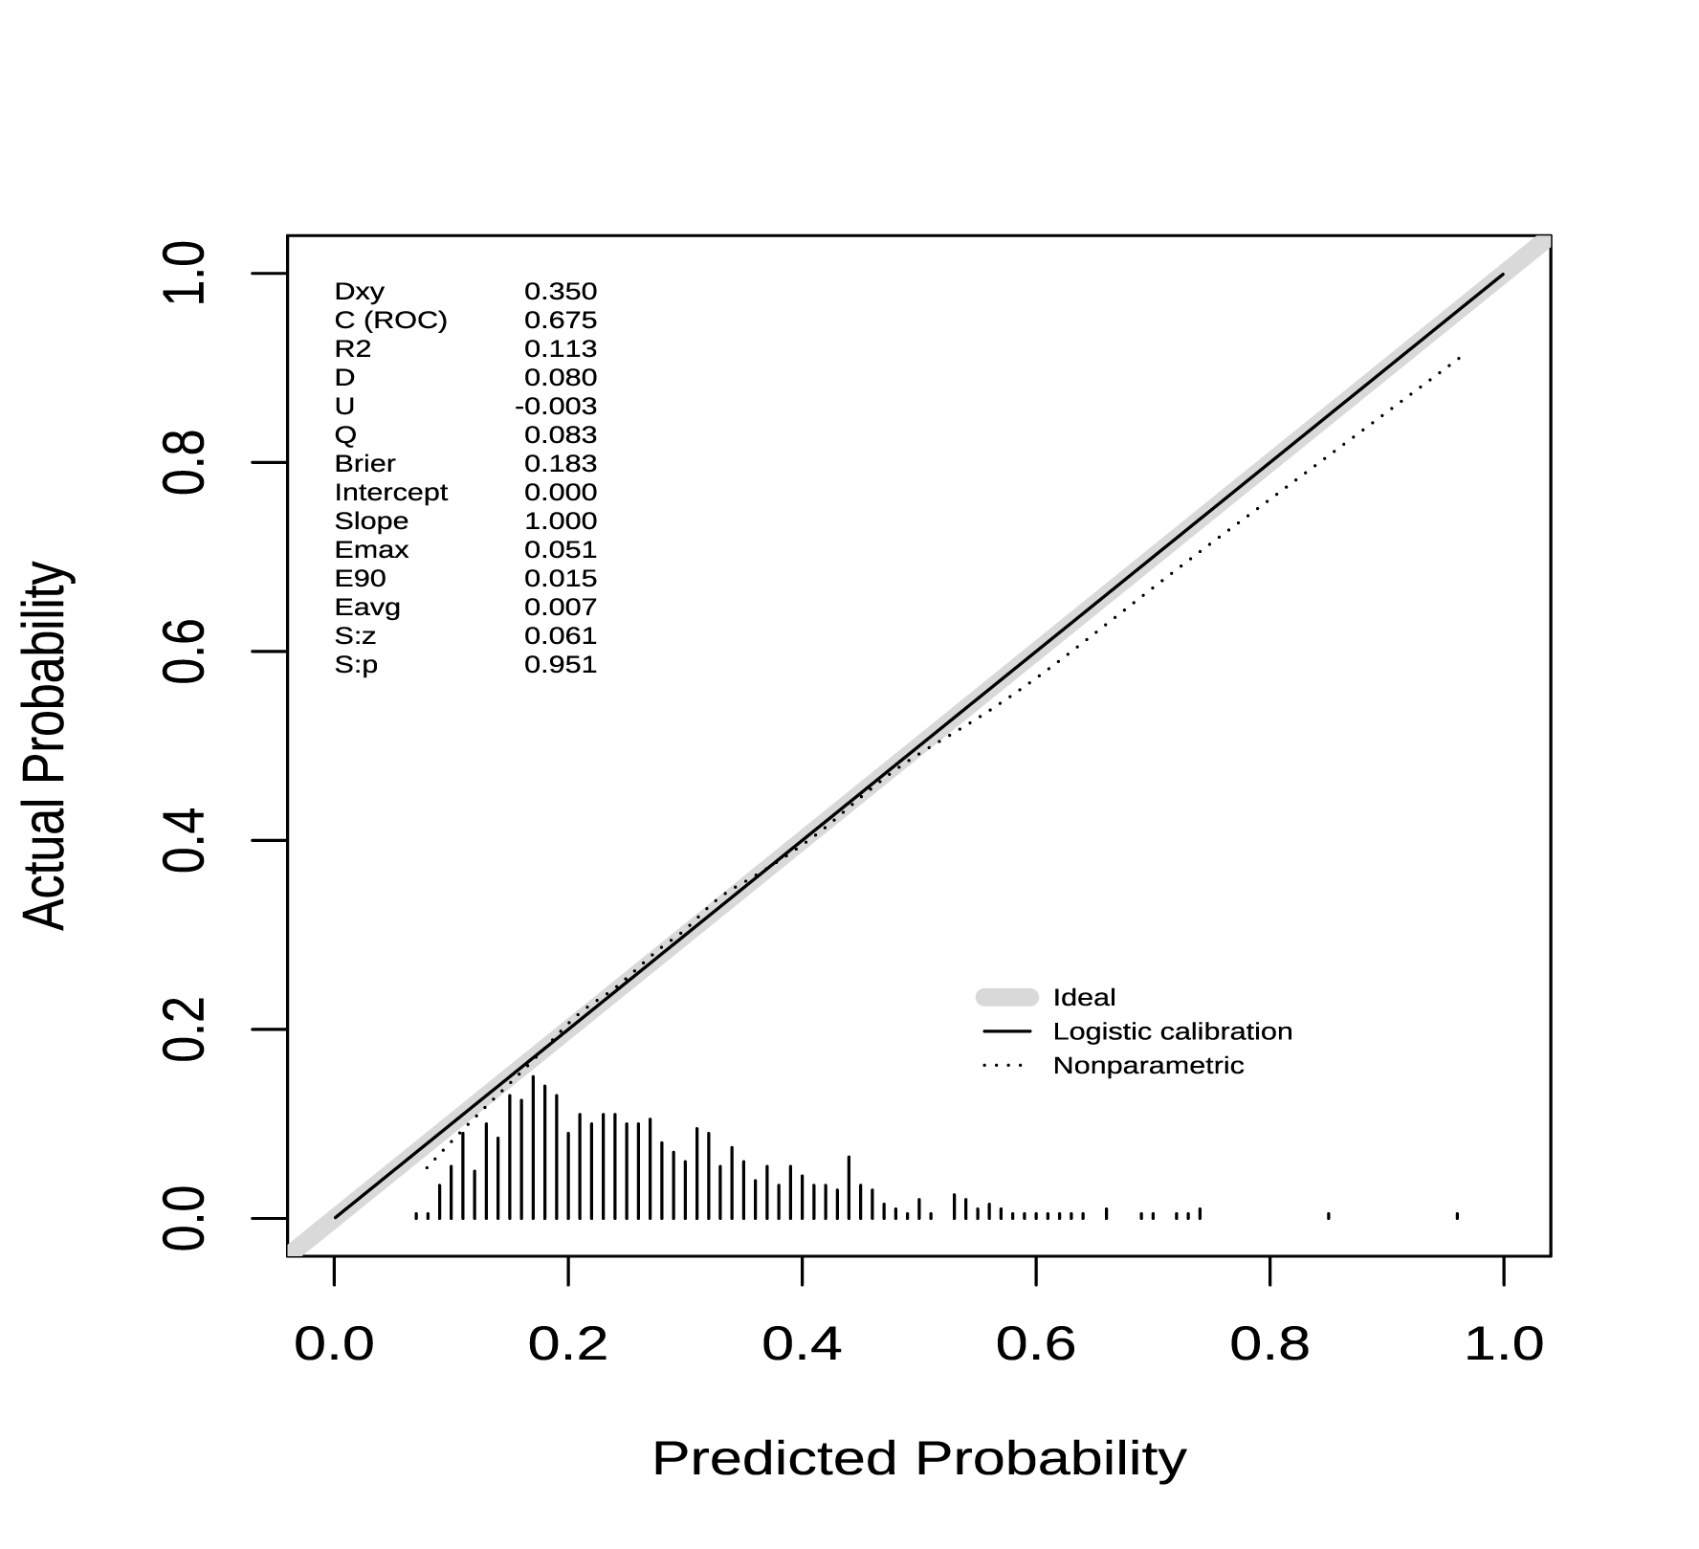


Figure S4. Decision curve analysis. Decision curve analysis for the APPLE score, APPLE score + PLR risk prediction models. Abbreviations: PLR, platelet to lymphocyte rateo.


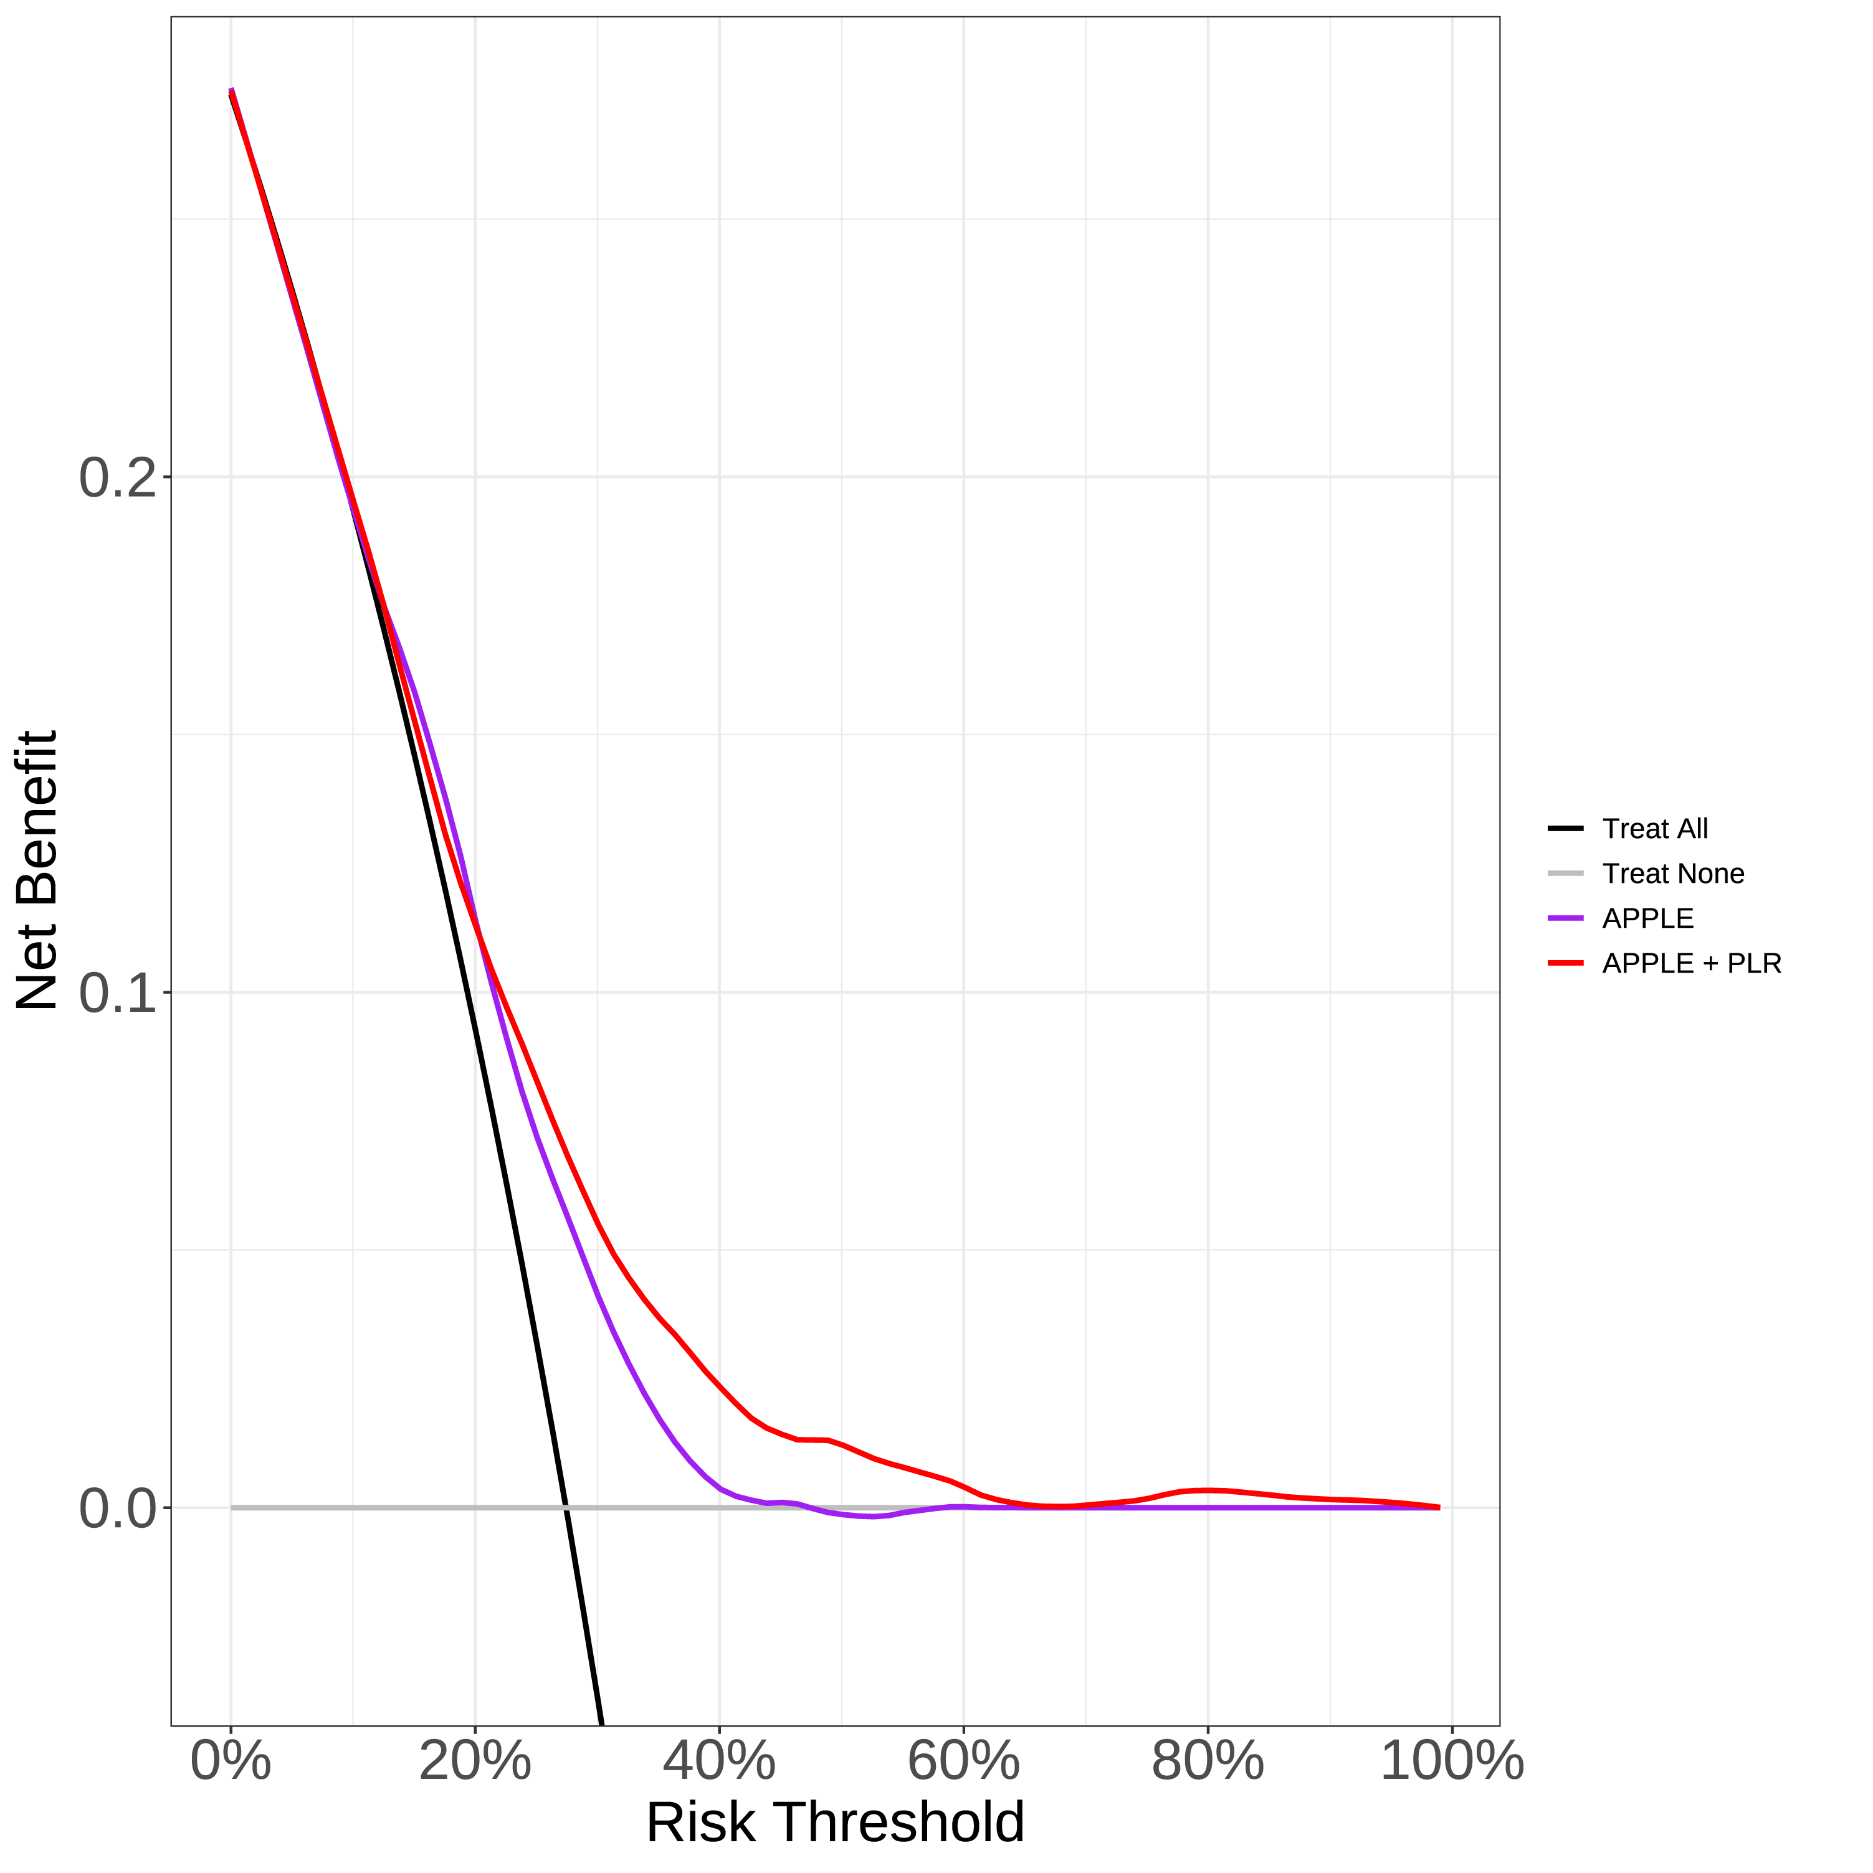


**Supplemental Table**

Table S1. Evaluation of the incremental prognostic value of adding the PLR to the APPLE score to predict the primary outcome in all patients

|  | C-index (95%CI) | P value | NRI (95%CI) | P value | IDI (95%CI) | P value |
| --- | --- | --- | --- | --- | --- | --- |
| Recurrence |  |  |  |  |  |  |
| APPLE | 0.645 (0.601 - 0.690) | <0.001 | ref | ref | ref | ref |
| APPLE+PLR | 0.675 (0.629 - 0.722) | <0.001 | 0.221 (0.049 - 0.394) | 0.012 | 0.029 (0.013 - 0.045) | <0.001 |

The primary outcome in this study was long-term recurrence. Abbreviations: PLR, platelet to lymphocyte rateo; NRI, net reclassifification improvement; IDI, integrated discrimination improvement. Abbreviations:
